# Supplementary material
Source: PubMed Central journal article supplement (PMC3163927)
Supplement: 97320630007015S1.pdf [file 97320630007015S1.pdf]

## Supplementary material:

**Table 1:** Motifs<sup>®</sup> observed in the transmembrane helices and loop regions of human and *Drosophila* GPCR clusters<sup>+</sup>

| Motifs in Single receptor type                |                          |               | Motifs in two different receptor types |                                |                       |
|-----------------------------------------------|--------------------------|---------------|----------------------------------------|--------------------------------|-----------------------|
| No                                            | Motif                    | Receptor Type | No                                     | Motif                          | Receptor Type         |
| 1                                             | VGL(TM1) <sup>1</sup>    | PR            | 17                                     | AIA(TM3) <sup>2</sup>          | PR,CMK                |
| 2                                             | GNL(TM1) <sup>1</sup>    | BGA           | 18                                     | CIS(TM3) <sup>2</sup>          | CMK,N&L               |
| 3                                             | VMP(TM2) <sup>1</sup>    | BGA           | 19                                     | LPL(TM5) <sup>2</sup>          | PR,CMK                |
| 4                                             | YLLNLA(TM2) <sup>1</sup> | CMK           | 20                                     | LYA(TM7) <sup>2</sup>          | PR,CMK                |
| 5                                             | TASI(TM3) <sup>1</sup>   | BGA           | <b>Motifs in multi-receptor type</b>   |                                |                       |
| 6                                             | LGF(TM5) <sup>1</sup>    | PR            | 21                                     | NLA(TM2) <sup>3</sup>          | PR, CMK, BGA          |
| 7                                             | PPF(TM6) <sup>1</sup>    | BGA           | 22                                     | ADLL(TM2) <sup>3</sup>         | CMK,N&L,BGA           |
| 8                                             | NSC(TM7) <sup>1</sup>    | PR            | 23                                     | CWLP(TM6) <sup>3</sup>         | PR,CMK,BGA            |
| 9                                             | WLGY(TM7) <sup>1</sup>   | BGA           | 24                                     | DLL(TM2) <sup>4</sup>          | PR,CMK,N&L,BGA        |
| 10                                            | HCC(TM7) <sup>1</sup>    | CMK           | <b>Motifs in Loop regions*</b>         |                                |                       |
| 11                                            | NPI(TM7) <sup>1</sup>    | PR            | 27                                     | MRTVTN(ICL1) <sup>1</sup>      | PR                    |
| <b>Motifs in two different receptor types</b> |                          |               | 28                                     | KLRN(ICL1) <sup>2</sup>        | BGA,SEC               |
| 12                                            | SLA(TM2) <sup>2</sup>    | PR,BGA        | 29                                     | LDR(ICL1) <sup>1</sup>         | PR                    |
| 13                                            | IYL(TM2) <sup>2</sup>    | CMK,N&L       | 30                                     | <i>DRYLA(ICL2)<sup>1</sup></i> | <i>PR,CMK</i>         |
| 14                                            | LFL(TM2) <sup>2</sup>    | PR,CMK        | 31                                     | <i>RYL(ICL2)<sup>3</sup></i>   | <i>PR,CMK,N&amp;L</i> |
| 15                                            | TLP(TM2) <sup>2</sup>    | PR,CMK        | 32                                     | WPFGE(ECL1) <sup>1</sup>       | PR                    |
| 16                                            | LPF(TM2) <sup>2</sup>    | PR,CMK        | 33                                     | LCK(ECL1) <sup>1</sup>         | PR                    |

@ The observed motifs were tabulated along with distribution of various receptor types of human and *Drosophila* GPCR clusters.

+ Topologies of observed motifs are given within brackets and number of occurrence is denoted in superscript with respect to the number of receptor types.

\* Motifs corresponding to the classic DRY motif are shown in *italics*.

Table S1, S2, S3, S4, S5, S6, S7 can be obtained from the URL:

[http://caps.ncbs.res.in/download/crossgenomeGPCRs/motif\\_supplementary.zip](http://caps.ncbs.res.in/download/crossgenomeGPCRs/motif_supplementary.zip)
